# Supplementary material for: Li4Ti5O12-based anode materials with low working potentials, high rate capabilities and high cyclability for high-power lithium-ion batteries: a synergistic effect of doping, incorporating a conductive phase and reducing the particle size
Source: Royal Society of Chemistry journal article supplement (doi:10.1039/c4ta01163e), 2014-01-01
Supplement: c4ta01163e1.pdf [file c4ta01163e1.pdf]

## Supporting Information

### **Li<sub>4</sub>Ti<sub>5</sub>O<sub>12</sub>-based anode materials with low working potentials, high rate capabilities and high cyclability for high-power lithium-ion batteries: synergistic effect of doping, incorporating a conductive phase and reducing particle size**

Chunfu Lin<sup>a</sup>, Xiaoyong Fan<sup>a</sup>, Yuelong Xin<sup>b</sup>, Fuquan Cheng<sup>b</sup>, Man On Lai<sup>a</sup>, Li Lu<sup>a\*</sup>, Henghui Zhou<sup>b\*</sup>

<sup>a</sup> Department of Mechanical Engineering, National University of Singapore, 9 Engineering Drive 1, Singapore 117576, Singapore

<sup>b</sup> College of Chemistry and Molecular Engineering, Peking University, Beijing 100871, PR China.

\* Corresponding authors. Tel.: +65 65162236; fax: +65 67791459. E-mail address: luli@nus.edu.sg (L. Lu).  
Tel.: +86 10 62757908; fax: +86 10 62757908. E-mail address: hhzhou@pku.edu.cn (H. Zhou).

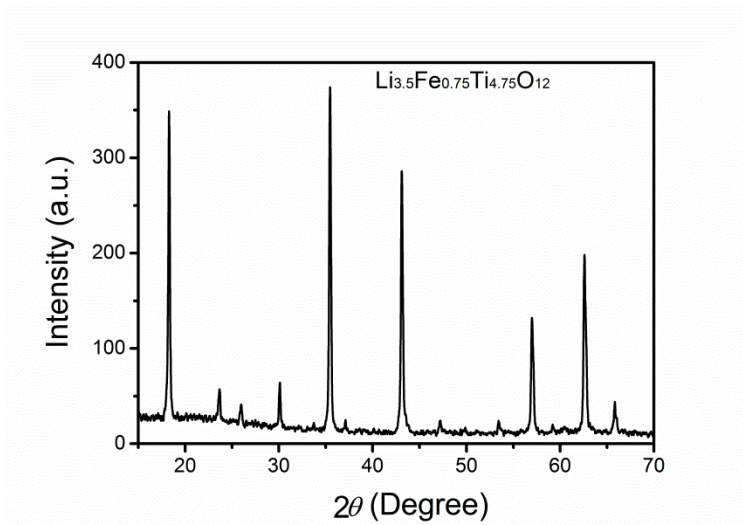

Fig. S1 X-ray diffraction pattern of Li<sub>3.5</sub>Fe<sub>0.75</sub>Ti<sub>4.75</sub>O<sub>12</sub>.

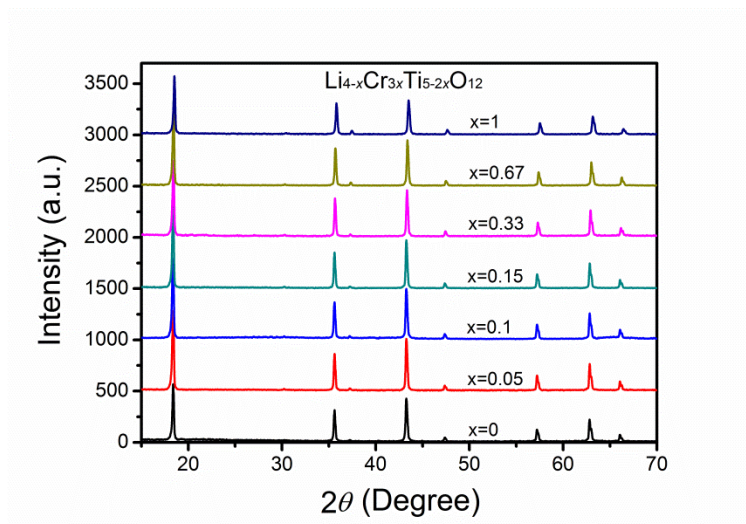

Fig. S2 X-ray diffraction patterns of  $\text{Li}_{4-x}\text{Cr}_{3x}\text{Ti}_{5-2x}\text{O}_{12}$  ( $0 \leq x \leq 1$ ).

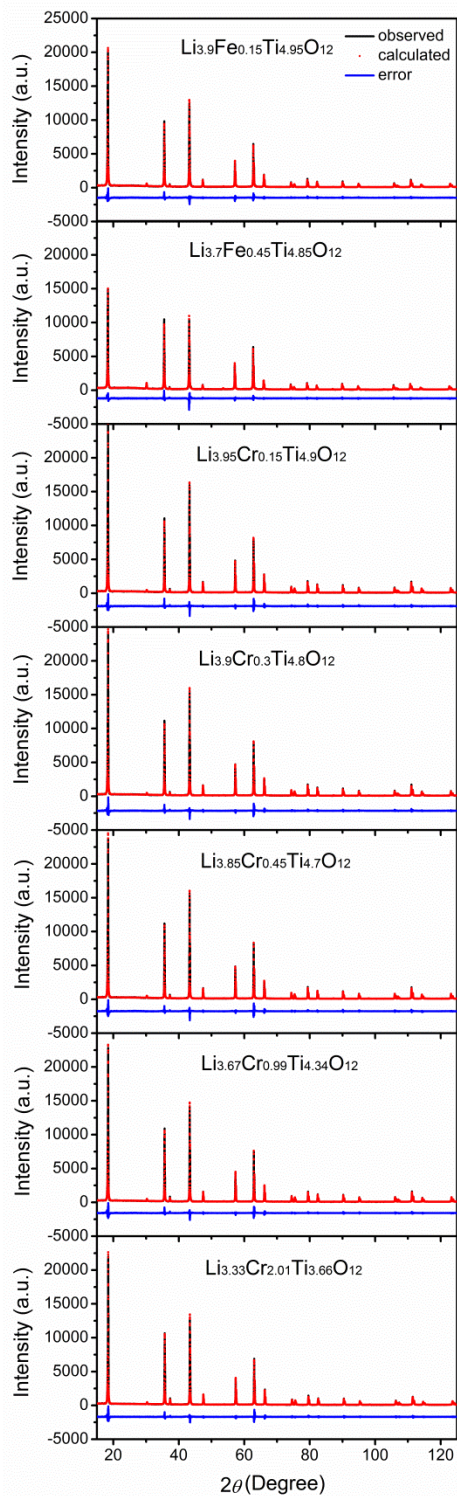

Fig. S3 Rietveld refinement plots of the X-ray diffraction patterns for  $\text{Li}_{3.9}\text{Fe}_{0.15}\text{Ti}_{4.95}\text{O}_{12}$ ,  $\text{Li}_{3.7}\text{Fe}_{0.45}\text{Ti}_{4.85}\text{O}_{12}$ ,  $\text{Li}_{3.95}\text{Cr}_{0.15}\text{Ti}_{4.9}\text{O}_{12}$ ,  $\text{Li}_{3.9}\text{Cr}_{0.3}\text{Ti}_{4.8}\text{O}_{12}$ ,  $\text{Li}_{3.85}\text{Cr}_{0.45}\text{Ti}_{4.7}\text{O}_{12}$ ,  $\text{Li}_{3.67}\text{Cr}_{0.99}\text{Ti}_{4.34}\text{O}_{12}$  and  $\text{Li}_{3.33}\text{Cr}_{2.01}\text{Ti}_{3.66}\text{O}_{12}$ .



Table S1 Rietveld refinement results of the X-ray diffraction patterns for  $\text{Li}_{4-2x}\text{Fe}_{3x}\text{Ti}_{5-x}\text{O}_{12}$  ( $0 \leq x \leq 0.15$ ) and  $\text{Li}_{4-x}\text{Cr}_{3x}\text{Ti}_{5-2x}\text{O}_{12}$  ( $0 \leq x \leq 1$ ).

| Spinel $\text{Li}_{4-2x}\text{Fe}_{3x}\text{Ti}_{5-x}\text{O}_{12}$ , space group: $Fd\bar{3}m$ (cubic) |         | Spinel $\text{Li}_{4-x}\text{Cr}_{3x}\text{Ti}_{5-2x}\text{O}_{12}$ , space group: $Fd\bar{3}m$ (cubic)    |                                                                                                            |                                                                                                            |                                                                                                            |                                                                                                            |                                                                                                            |                                                                                                            |                                                                                                            |                                                                                                            |                                                                                                            |
|---------------------------------------------------------------------------------------------------------|---------|------------------------------------------------------------------------------------------------------------|------------------------------------------------------------------------------------------------------------|------------------------------------------------------------------------------------------------------------|------------------------------------------------------------------------------------------------------------|------------------------------------------------------------------------------------------------------------|------------------------------------------------------------------------------------------------------------|------------------------------------------------------------------------------------------------------------|------------------------------------------------------------------------------------------------------------|------------------------------------------------------------------------------------------------------------|------------------------------------------------------------------------------------------------------------|
| Composition                                                                                             | $x$     | 0                                                                                                          | 0.05                                                                                                       | 0.1                                                                                                        | 0.15                                                                                                       | 0.05                                                                                                       | 0.1                                                                                                        | 0.15                                                                                                       | 0.33                                                                                                       | 0.67                                                                                                       | 1                                                                                                          |
| Nominal composition                                                                                     |         | $[\text{Li}_{2.997}\text{Ti}_{0.003}]_{8a}[\text{Li}_{1.003}\text{Ti}_{4.997}]_{16d}[\text{O}_{12}]_{32e}$ | $[\text{Li}_{2.855}\text{Ti}_{0.145}]_{8a}[\text{Li}_{1.045}\text{Ti}_{4.805}]_{16d}[\text{O}_{12}]_{32e}$ | $[\text{Li}_{2.663}\text{Ti}_{0.337}]_{8a}[\text{Li}_{1.137}\text{Ti}_{4.563}]_{16d}[\text{O}_{12}]_{32e}$ | $[\text{Li}_{2.470}\text{Ti}_{0.530}]_{8a}[\text{Li}_{1.230}\text{Ti}_{4.320}]_{16d}[\text{O}_{12}]_{32e}$ | $[\text{Li}_{2.994}\text{Ti}_{0.006}]_{8a}[\text{Li}_{0.956}\text{Ti}_{4.894}]_{16d}[\text{O}_{12}]_{32e}$ | $[\text{Li}_{2.985}\text{Ti}_{0.015}]_{8a}[\text{Li}_{0.915}\text{Ti}_{4.785}]_{16d}[\text{O}_{12}]_{32e}$ | $[\text{Li}_{2.960}\text{Ti}_{0.040}]_{8a}[\text{Li}_{0.890}\text{Ti}_{4.660}]_{16d}[\text{O}_{12}]_{32e}$ | $[\text{Li}_{2.931}\text{Ti}_{0.069}]_{8a}[\text{Li}_{0.739}\text{Ti}_{4.271}]_{16d}[\text{O}_{12}]_{32e}$ | $[\text{Li}_{2.896}\text{Ti}_{0.104}]_{8a}[\text{Li}_{0.434}\text{Ti}_{3.556}]_{16d}[\text{O}_{12}]_{32e}$ | $[\text{Li}_{2.828}\text{Ti}_{0.172}]_{8a}[\text{Li}_{0.172}\text{Ti}_{2.828}]_{16d}[\text{O}_{12}]_{32e}$ |
|                                                                                                         |         |                                                                                                            |                                                                                                            |                                                                                                            |                                                                                                            |                                                                                                            |                                                                                                            |                                                                                                            |                                                                                                            |                                                                                                            |                                                                                                            |
| Lattice parameter                                                                                       | $a$ (Å) | 8.36122(3)                                                                                                 | 8.36535(4)                                                                                                 | 8.36974(4)                                                                                                 | 8.37460(4)                                                                                                 | 8.35922(3)                                                                                                 | 8.35763(3)                                                                                                 | 8.35616(3)                                                                                                 | 8.34972(3)                                                                                                 | 8.33761(3)                                                                                                 | 8.32699(4)                                                                                                 |
| 8a                                                                                                      | Li1     | 0.999(1)                                                                                                   | 0.952(1)                                                                                                   | 0.888(1)                                                                                                   | 0.823(1)                                                                                                   | 0.998(1)                                                                                                   | 0.995(1)                                                                                                   | 0.987(1)                                                                                                   | 0.977(1)                                                                                                   | 0.965(1)                                                                                                   | 0.943(1)                                                                                                   |
|                                                                                                         | Ti1     | 0.001(1)                                                                                                   | 0.048(1)                                                                                                   | 0.112(1)                                                                                                   | 0.177(2)                                                                                                   | 0.002(1)                                                                                                   | 0.005(1)                                                                                                   | 0.013(1)                                                                                                   | 0.023(1)                                                                                                   | 0.035(1)                                                                                                   | 0.057(1)                                                                                                   |
| 16d                                                                                                     | Li2     | 0.167(1)                                                                                                   | 0.174(1)                                                                                                   | 0.190(1)                                                                                                   | 0.205(1)                                                                                                   | 0.159(1)                                                                                                   | 0.153(1)                                                                                                   | 0.148(1)                                                                                                   | 0.123(1)                                                                                                   | 0.072(1)                                                                                                   | 0.029(1)                                                                                                   |
|                                                                                                         | Ti2     | $f$ 0.833(1)                                                                                               | 0.801(1)                                                                                                   | 0.760(1)                                                                                                   | 0.720(1)                                                                                                   | 0.816(1)                                                                                                   | 0.797(1)                                                                                                   | 0.777(1)                                                                                                   | 0.712(1)                                                                                                   | 0.593(1)                                                                                                   | 0.471(1)                                                                                                   |
|                                                                                                         | Fe/Cr   | –                                                                                                          | 0.025(–)                                                                                                   | 0.05(–)                                                                                                    | 0.075(–)                                                                                                   | 0.025(–)                                                                                                   | 0.05(–)                                                                                                    | 0.075(–)                                                                                                   | 0.165(–)                                                                                                   | 0.335(–)                                                                                                   | 0.5(–)                                                                                                     |
| 32e                                                                                                     | O       | 1(–)                                                                                                       | 1(–)                                                                                                       | 1(–)                                                                                                       | 1(–)                                                                                                       | 1(–)                                                                                                       | 1(–)                                                                                                       | 1(–)                                                                                                       | 1(–)                                                                                                       | 1(–)                                                                                                       | 1(–)                                                                                                       |
|                                                                                                         | $z$     | 0.26301(7)                                                                                                 | 0.26296(6)                                                                                                 | 0.26294(6)                                                                                                 | 0.26291(7)                                                                                                 | 0.26297(7)                                                                                                 | 0.26291(6)                                                                                                 | 0.26287(7)                                                                                                 | 0.26279(7)                                                                                                 | 0.26259(7)                                                                                                 | 0.26249(7)                                                                                                 |
| $R_{wp}$                                                                                                |         | 0.1029                                                                                                     | 0.0953                                                                                                     | 0.0894                                                                                                     | 0.0908                                                                                                     | 0.1030                                                                                                     | 0.1010                                                                                                     | 0.1013                                                                                                     | 0.0995                                                                                                     | 0.0988                                                                                                     | 0.0933                                                                                                     |
| $R_p$                                                                                                   |         | 0.0787                                                                                                     | 0.0744                                                                                                     | 0.0689                                                                                                     | 0.0689                                                                                                     | 0.0787                                                                                                     | 0.0768                                                                                                     | 0.0774                                                                                                     | 0.0760                                                                                                     | 0.0762                                                                                                     | 0.0712                                                                                                     |
| $\chi^2$                                                                                                |         | 3.005                                                                                                      | 2.598                                                                                                      | 2.271                                                                                                      | 2.348                                                                                                      | 3.002                                                                                                      | 2.896                                                                                                      | 2.886                                                                                                      | 2.665                                                                                                      | 2.589                                                                                                      | 2.313                                                                                                      |

$f$ : site occupancy,  $z$ : fractional coefficient,  $R_{wp}$ : weighted profile residual,  $R_p$ : profile residual, and  $\chi^2$ : goodness of fit.

Table S2 Properties of all the samples.

| Sample                                                                   | Specific surface area (m <sup>2</sup> g <sup>-1</sup> ) | $R_s$ ( $\Omega$ ) | $R_{ct}$ ( $\Omega$ ) | $\sigma_w$ ( $\Omega \cdot s^{-0.5}$ ) | $D$ (cm <sup>2</sup> ·s <sup>-1</sup> ) | Electronic conductivity (S·cm <sup>-1</sup> ) | Discharge potential at 0.1 C (mV) | Charge potential at 0.1 C (mV) | Working potential at 0.1 C (mV) | Capacity at 0.5 C (mAh g <sup>-1</sup> ) | Capacity at 1 C (mAh g <sup>-1</sup> ) | Capacity at 2 C (mAh g <sup>-1</sup> ) | Capacity at 5 C (mAh g <sup>-1</sup> ) | Capacity at 10 C (mAh g <sup>-1</sup> ) | Capacity retention over 200 cycles (%) |
|--------------------------------------------------------------------------|---------------------------------------------------------|--------------------|-----------------------|----------------------------------------|-----------------------------------------|-----------------------------------------------|-----------------------------------|--------------------------------|---------------------------------|------------------------------------------|----------------------------------------|----------------------------------------|----------------------------------------|-----------------------------------------|----------------------------------------|
| Li <sub>4</sub> Ti <sub>5</sub> O <sub>12</sub>                          | 3.6                                                     | 3.23               | 89.3                  | 10.9                                   | $5.74 \times 10^{-15}$                  | $<1 \times 10^{-9}$                           | 1555.9                            | 1574.8                         | 1565.4                          | 166                                      | 143                                    | 105                                    | 33                                     | 11                                      | –                                      |
| Li <sub>3.9</sub> Fe <sub>0.15</sub> Ti <sub>4.95</sub> O <sub>12</sub>  | 4.4                                                     | 2.68               | 62.5                  | 7.78                                   | $8.11 \times 10^{-15}$                  | $1.9 \times 10^{-8}$                          | 1539.2                            | 1583.5                         | 1561.4                          | 161                                      | 151                                    | 131                                    | 82                                     | 39                                      | –                                      |
| Li <sub>3.8</sub> Fe <sub>0.3</sub> Ti <sub>4.9</sub> O <sub>12</sub>    | 4.0                                                     | 3.66               | 58.8                  | 7.58                                   | $1.14 \times 10^{-14}$                  | $8.9 \times 10^{-8}$                          | 1531.4                            | 1581.4                         | 1556.4                          | 152                                      | 148                                    | 137                                    | 100                                    | 57                                      | –                                      |
| Li <sub>3.7</sub> Fe <sub>0.45</sub> Ti <sub>4.85</sub> O <sub>12</sub>  | 4.3                                                     | 3.00               | 64.4                  | 8.22                                   | $6.89 \times 10^{-15}$                  | $1.7 \times 10^{-7}$                          | 1523.4                            | 1578.0                         | 1550.7                          | 149                                      | 136                                    | 104                                    | 61                                     | 36                                      | –                                      |
| Li <sub>3.95</sub> Cr <sub>0.15</sub> Ti <sub>4.9</sub> O <sub>12</sub>  | 2.6                                                     | 2.85               | 81.6                  | 14.4                                   | $6.37 \times 10^{-15}$                  | $3.4 \times 10^{-8}$                          | 1550.7                            | 1574.2                         | 1562.5                          | 158                                      | 136                                    | 101                                    | 50                                     | 21                                      | –                                      |
| Li <sub>3.9</sub> Cr <sub>0.3</sub> Ti <sub>4.8</sub> O <sub>12</sub>    | 2.4                                                     | 2.44               | 62.8                  | 9.87                                   | $1.63 \times 10^{-14}$                  | $4.7 \times 10^{-8}$                          | 1548.8                            | 1571.8                         | 1560.3                          | 154                                      | 134                                    | 104                                    | 58                                     | 25                                      | –                                      |
| Li <sub>3.85</sub> Cr <sub>0.45</sub> Ti <sub>4.7</sub> O <sub>12</sub>  | 2.0                                                     | 2.35               | 65.4                  | 12.9                                   | $1.30 \times 10^{-14}$                  | $5.5 \times 10^{-8}$                          | 1546.6                            | 1570.8                         | 1558.7                          | 147                                      | 128                                    | 97                                     | 43                                     | 17                                      | –                                      |
| Li <sub>3.67</sub> Cr <sub>0.99</sub> Ti <sub>4.34</sub> O <sub>12</sub> | 1.9                                                     | 2.81               | 74.0                  | 17.3                                   | $8.37 \times 10^{-15}$                  | $6.7 \times 10^{-8}$                          | 1536.1                            | 1566.8                         | 1551.5                          | 145                                      | 126                                    | 94                                     | 47                                     | 20                                      | –                                      |
| Li <sub>3.33</sub> Cr <sub>2.01</sub> Ti <sub>3.66</sub> O <sub>12</sub> | 1.9                                                     | 2.82               | 61.8                  | 9.23                                   | $2.92 \times 10^{-14}$                  | $1.1 \times 10^{-7}$                          | 1517.5                            | 1552.8                         | 1535.2                          | 141                                      | 132                                    | 118                                    | 83                                     | 42                                      | –                                      |
| LiCrTiO <sub>4</sub>                                                     | 2.5                                                     | 3.96               | 51.5                  | 5.77                                   | $4.25 \times 10^{-14}$                  | $1.3 \times 10^{-7}$                          | 1503.5                            | 1544.5                         | 1524.0                          | 138                                      | 129                                    | 118                                    | 97                                     | 70                                      | –                                      |
| Li <sub>3.8</sub> Fe <sub>0.3</sub> Ti <sub>4.9</sub> O <sub>12</sub>    | –                                                       | –                  | –                     | –                                      | –                                       | –                                             | 1534.9                            | 1578.0                         | 1556.5                          | 158                                      | 154                                    | 148                                    | 130                                    | 106                                     | 117                                    |
| /MWCNTs                                                                  |                                                         |                    |                       |                                        |                                         |                                               |                                   |                                |                                 |                                          |                                        |                                        |                                        |                                         |                                        |
| LiCrTiO <sub>4</sub>                                                     | –                                                       | –                  | –                     | –                                      | –                                       | –                                             | 1507.0                            | 1535.9                         | 1521.5                          | 141                                      | 137                                    | 131                                    | 120                                    | 106                                     | 94.6                                   |
| /MWCNTs-post                                                             |                                                         |                    |                       |                                        |                                         |                                               |                                   |                                |                                 |                                          |                                        |                                        |                                        |                                         |                                        |
| LiCrTiO <sub>4</sub>                                                     | –                                                       | –                  | –                     | –                                      | –                                       | –                                             | 1508.5                            | 1529.9                         | 1519.2                          | 140                                      | 137                                    | 133                                    | 128                                    | 120                                     | 95.9                                   |
| /MWCNTs                                                                  |                                                         |                    |                       |                                        |                                         |                                               |                                   |                                |                                 |                                          |                                        |                                        |                                        |                                         |                                        |

Table S3 Electronic conductivities of LTO materials using different dopings, all of which were measured using the same two-probe method [12,13].

| Nominal formula                                | $\text{Li}_4\text{Ti}_5\text{O}_{12}$ | $\text{Li}_{3.7}\text{Fe}_{0.45}\text{Ti}_{4.85}\text{O}_{12}$ | $\text{LiCrTiO}_4$   | $\text{Li}_{3.95}\text{Co}_{0.15}\text{Ti}_{4.9}\text{O}_{12}$ | $\text{Li}_{3.95}\text{Al}_{0.15}\text{Ti}_{4.9}\text{O}_{12}$ | $\text{Li}_4\text{Ta}_{0.05}\text{Ti}_{4.95}\text{O}_{12}$ | $\text{Li}_{3.95}\text{Ga}_{0.15}\text{Ti}_{4.9}\text{O}_{12}$ | $\text{Li}_{3.9}\text{Mg}_{0.1}\text{Al}_{0.15}\text{Ti}_{4.85}\text{O}_{12}$ |
|------------------------------------------------|---------------------------------------|----------------------------------------------------------------|----------------------|----------------------------------------------------------------|----------------------------------------------------------------|------------------------------------------------------------|----------------------------------------------------------------|-------------------------------------------------------------------------------|
| Electronic conductivity ( $\text{S cm}^{-1}$ ) | $<1 \times 10^{-9}$                   | $1.7 \times 10^{-7}$                                           | $1.2 \times 10^{-7}$ | $1.3 \times 10^{-9}$                                           | $1.1 \times 10^{-8}$                                           | $1.0 \times 10^{-9}$                                       | $2.0 \times 10^{-9}$                                           | $7.9 \times 10^{-9}$                                                          |
